# Supplementary material for: Anisotropic Raman spectral analysis and laser output based on large-sized scheelite bismuth molybdate tungstate mixed crystals
Source: Royal Society of Chemistry journal article supplement (doi:10.1039/d3ce00971h), 2024-01-01
Supplement: d3ce00971h1.pdf [file d3ce00971h1.pdf]

Supplementary Information:

**Anisotropic Raman spectral analysis and laser output based on large-sized Scheelite bismuth molybdate tungstate mixed crystals**

Xiangxin Tian,<sup>\*,a</sup> Lijuan Chen,<sup>\*,b</sup> Peng Zhao,<sup>c</sup> Youxuan Sun,<sup>d</sup> and Zeliang Gao<sup>\*,d</sup>

<sup>a</sup> School of Materials and Engineering, Linyi University, Linyi 276000, China.

<sup>b</sup> School of Physics and Technology, University of Jinan, Jinan 250100, China.

<sup>c</sup> Sinoma Synthetic Crystals Co., Ltd., Beijing 100018, China.

<sup>d</sup> State Key Laboratory of Crystal Materials, Shandong University, Jinan 250100, China.

**Figure S1.** EDS composition analysis based on the as-grown single crystal of BMO.

**Figure S2.** Polarized spontaneous Raman spectra of BMO crystal under different geometric configurations with the incident light propagating along the optical X principal axis. (a)-(d) represent the polarized Raman spectra under the X(YY)X, X(ZZ)X, X(YZ)X, and X(ZY)X configurations, respectively.

**Figure S3.** Polarized spontaneous Raman spectra of BMO crystal under different geometric configurations with the incident light propagating along the optical Y principal axis. (a)-(d) represent the polarized Raman spectra under the Y(XX)Y, Y(ZZ)Y, Y(XZ)Y, and Y(ZX)Y configurations, respectively.

**Figure S4.** Polarized spontaneous Raman spectra of BMO crystal under different geometric configurations with the incident light propagating along the optical Z principal axis. (a)-(d) represent the polarized Raman spectra under the Z(XX)Z, Z(YY)Z, Z(XY)Z, and Z(YX)Z configurations, respectively.

**Table S1.** EDS analysis results of the BMO mixed crystals

**Table S2.** XRF analysis results of the BMO mixed crystals.

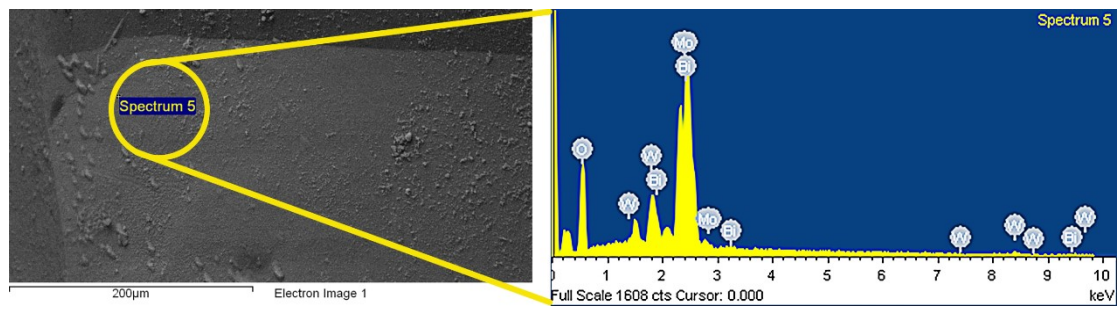

**Figure S1.** EDS composition analysis based on the as-grown single crystal of BMO.

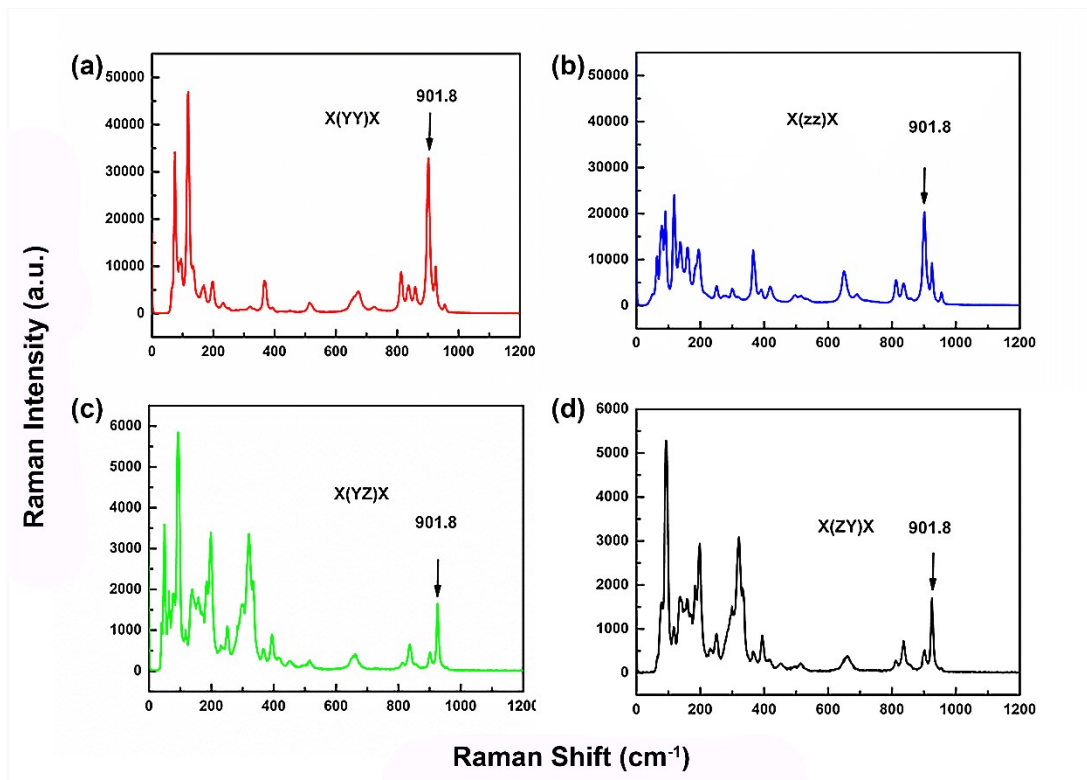

**Figure S2.** Polarized spontaneous Raman spectra of BMO crystal under different geometric configurations with the incident light propagating along the optical X principal axis. (a)-(d) represent the polarized Raman spectra under the X(YY)X, X(ZZ)X, X(YZ)X, and X(ZY)X configurations, respectively.

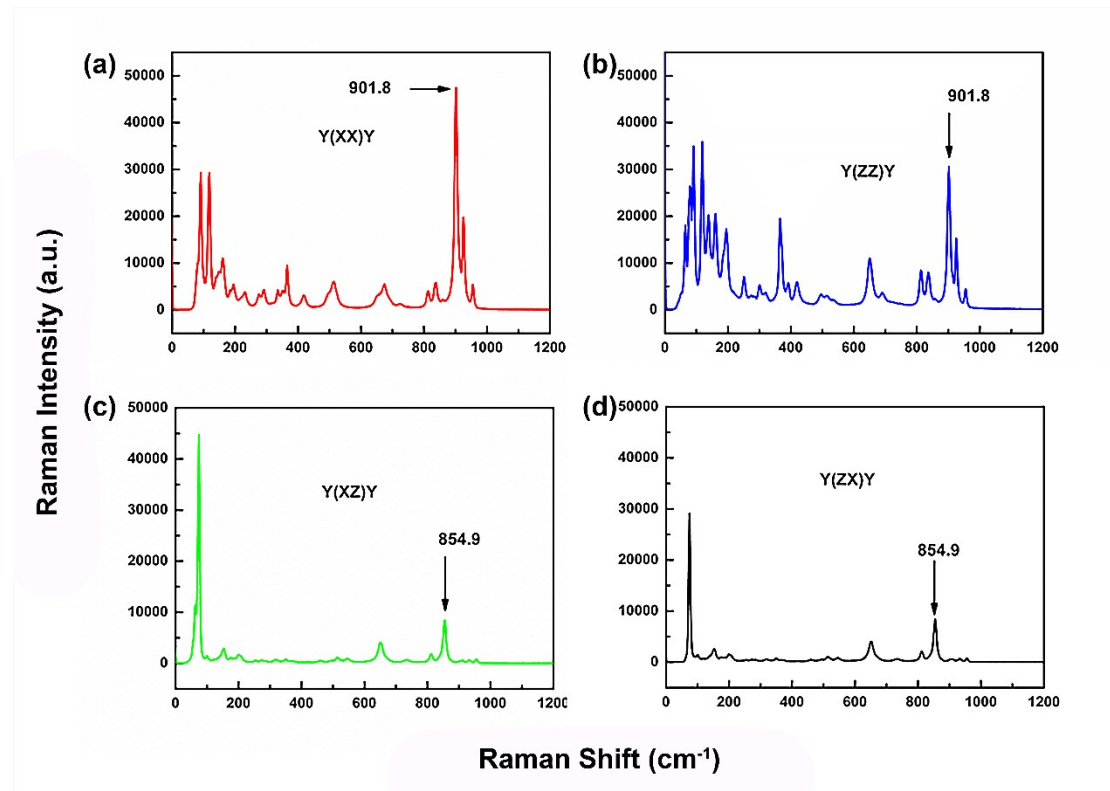

**Figure S3.** Polarized spontaneous Raman spectra of BMO crystal under different geometric configurations with the incident light propagating along the optical Y principal axis. (a)-(d) represent the polarized Raman spectra under the Y(XX)Y, Y(ZZ)Y, Y(XZ)Y, and Y(ZX)Y configurations, respectively.

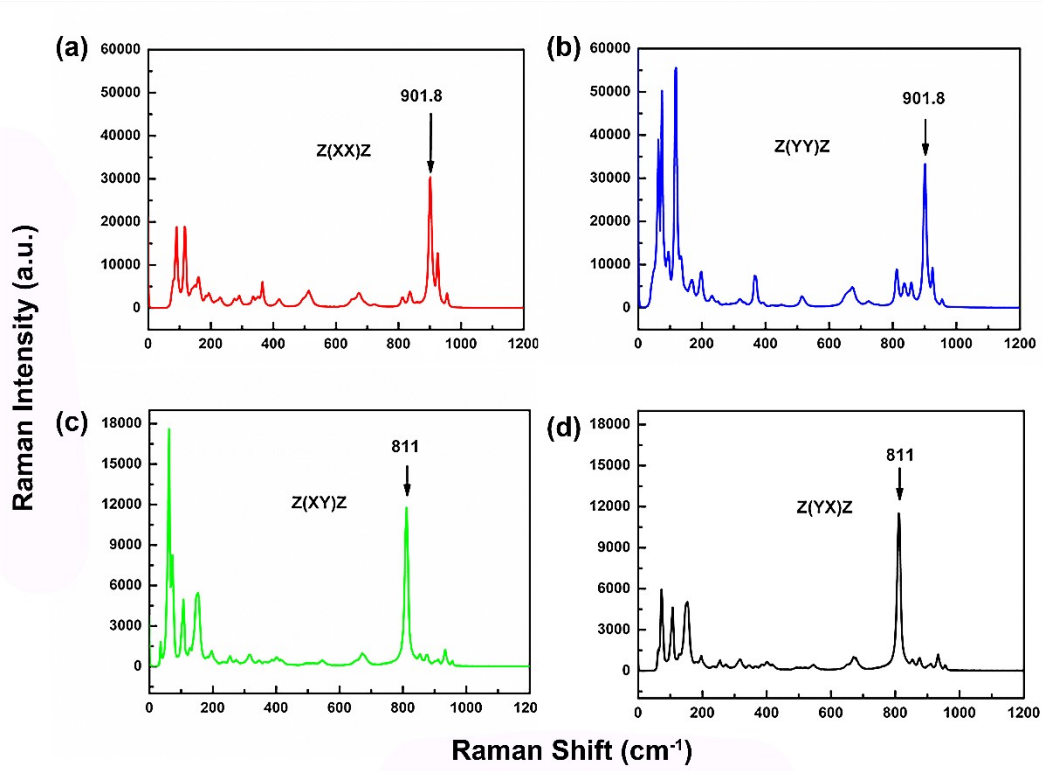

**Figure S4.** Polarized spontaneous Raman spectra of BMO crystal under different geometric configurations with the incident light propagating along the optical Z principal axis. (a)-(d) represent the polarized Raman spectra under the Z(XX)Z, Z(YY)Z, Z(XY)Z, and Z(YX)Z configurations, respectively.

**Table S1.** EDS analysis results of the BMO mixed crystals

| <b>Element</b> | <b>Weight%</b> | <b>Atomic%</b> |
|----------------|----------------|----------------|
| Bi             | 37.00          | 8.29           |
| Mo             | 28.03          | 13.68          |
| W              | 9.09           | 2.32           |
| O              | 25.87          | 75.71          |
| Total          | 100            | 100            |

**Table S2.** XRF analysis results of the BMO mixed crystals.

| <b>Element</b> | <b>Weight%</b> | <b>Atomic%</b> |
|----------------|----------------|----------------|
| Bi             | 56.6           | 40.5           |
| Mo             | 32.7           | 50.9           |
| W              | 10.6           | 8.6            |
| Total          | 100            | 100            |
